# Supplementary material
Source: publisher site journal article supplement (https://www.dovepress.com/article/466029)
Supplement: Supplementary file 1 [file get_supplementary_file.php]

| Supplementary table 1. Crosstabulation of Clavien–Dindo grade variables of surgical complication variables. | | | | | | | | | | | |
| --- | --- | --- | --- | --- | --- | --- | --- | --- | --- | --- | --- |
|  |  |  |  |  |  |  |  |  |  |  |  |
| Re-abstraction | Original | | | |  | Re-abstraction | Original | | | | |
| **Wound infection** | CD2 | CD3a | CD3b | Total |  | **Anastomotic leak** | CD2 | CD3a | CD3b | CD4a | Total |
| CD2 | 11 | 1 | 1 | 13 |  | CD2 | 4 | 2 | 0 | 0 | 6 |
| CD3a | 0 | 0 | 0 | 0 |  | CD3a | 0 | 2 | 0 | 0 | 2 |
| CD3b | 1 | 0 | 2 | 3 |  | CD3b | 0 | 0 | 7 | 0 | 7 |
| Total | 12 | 1 | 3 | 16 |  | CD4a | 0 | 0 | 5 | 0 | 5 |
|  | *Exact agreement: 81.3%* | | | |  | Total | 4 | 4 | 12 | 0 | 20 |
|  |  |  |  |  |  |  | *Exact agreement: 65%* | | | | |
| Re-abstraction | Original | | | |  | Re-abstraction | Original | | | |  |
| **Intraabdominal infection** | CD2 | CD3a | CD3b | Total |  | **Haemorrhage** | CD2 | CD3a | CD3b | Total |  |
| CD2 | 8 | 1 | 0 | 9 |  | CD2 | 2 | 0 | 0 | 2 |  |
| CD3a | 0 | 7 | 3 | 10 |  | CD3a | 0 | 0 | 0 | 0 |  |
| CD3b | 0 | 0 | 3 | 3 |  | CD3b | 0 | 0 | 0 | 0 |  |
| Total | 8 | 8 | 6 | 22 |  | Total | 2 | 0 | 0 | 2 |  |
|  | *Exact agreement: 81.8%* | | | |  |  | Exact agreement: 100% | | | |  |
| Re-abstraction | Original | | |  |  | Re-abstraction | Original | | |  |  |
| **Wound dehiscence** | CD2 | CD3b | Total |  |  | **Stoma complication** | CD2 | CD3b | Total |  |  |
| CD2 | 0 | 0 | 0 |  |  | CD2 | 1 | 0 | 1 |  |  |
| CD3b | 0 | 6 | 6 |  |  | CD3b | 0 | 2 | 2 |  |  |
| Total | 0 | 6 | 6 |  |  | Total | 1 | 0 | 3 |  |  |
|  | *Exact agreement: 100%* | | |  |  |  | *Exact agreement: 100%* | | |  |  |
| Re-abstraction | Original | | | |  |  |  | | | |  |
| **Other surgical complication** | CD3a | CD3b | CD4a | Total |  |  |  |  |  |  |  |
| CD3a | 1 | 0 | 0 | 1 |  |  |  |  |  |  |  |
| CD3b | 0 | 3 | 0 | 3 |  |  |  |  |  |  |  |
| CD4a | 1 | 0 | 0 | 1 |  |  |  |  |  |  |  |
| Total | 2 | 3 | 0 | 5 |  |  |  |  |  |  |  |
|  | *Exact agreement: 80.0%* | | | |  |  |  |  |  |  |  |

Supplementary table 2. Crosstabulation of complication variables.

| Re-abstraction | Original | | |  | Re-abstraction | Original | | |
| --- | --- | --- | --- | --- | --- | --- | --- | --- |
| **Pneumonia** | No | Yes | Total |  | **Cardiac arrythmia** | No | Yes | Total |
| No | 72 | 3 | 75 |  | No | 16 | 1 | 17 |
| Yes | 9 | 14 | 23 |  | Yes | 8 | 4 | 12 |
| Total | 81 | 17 | 98 |  | Total | 24 | 5 | 29 |
| *Exact agreement: 87.8%* | | | |  | Exact agreement: | | | |
|  |  |  |  |  |  |  |  |  |
| Re-abstraction | Original | | |  | Re-abstraction | Original | | |
| **Sepsis** | No | Yes | Total |  | **Heart failure** | No | Yes | Total |
| No | 86 | 6 | 92 |  | No | 25 | 1 | 26 |
| Yes | 4 | 2 | 6 |  | Yes | 3 | 0 | 3 |
| Total | 90 | 8 | 98 |  | Total | 28 | 1 | 29 |
| *Exact agreement: 89.8%* | | | |  | Exact agreement: 86.2% | | | |
|  |  |  |  |  |  |  |  |  |
| Re-abstraction | Original | | |  | Re-abstraction | Original | | |
| **Other postoperative infection** | No | Yes | Total |  | **DVT** | No | Yes | Total |
| No | 30 | 12 | 42 |  | No | 24 | 2 | 26 |
| Yes | 48 | 8 | 56 |  | Yes | 2 | 1 | 3 |
| Total | 78 | 20 | 98 |  | Total | 26 | 3 | 29 |
| *Exact agreement: 38.8%* | | | |  | Exact agreement: 86.2% | | | |
|  |  |  |  |  |  |  |  |  |
| Re-abstraction | Original | | |  | Re-abstraction | Original | | |
| **Myocardial infarction** | No | Yes | Total |  | **Neurological complications** | No | Yes | Total |
| No | 26 | 0 | 26 |  | No | 269 | 2 | 271 |
| Yes | 1 | 2 | 3 |  | Yes | 2 | 0 | 2 |
| Total | 27 | 2 | 29 |  | Total | 271 | 2 | 273 |
|  | Exact agreement: 96.6% | | |  | Exact agreement: 98.5% | | | |
|  |  |  |  |  |  |  |  |  |
| Re-abstraction | Original | | |  | Re-abstraction | Original | | |
| **Wound infection** | No | Yes | Total |  | **Anastomotic leak** | No | Yes | Total |
| No | 81 | 12 | 93 |  | No | 100 | 2 | 102 |
| Yes | 23 | 16 | 39 |  | Yes | 10 | 20 | 30 |
| Total | 104 | 28 | 132 |  | Total | 110 | 22 | 132 |
| *Exact agreement: 73.5%* | | | |  | *Exact agreement: 90.1* | | | |
|  |  |  |  |  |  |  |  |  |
| Re-abstraction | Original | | |  | Re-abstraction | Original | | |
| **Intraabdominal infection** | No | Yes | Total |  | **Haemorrhage** | No | Yes | Total |
| No | 85 | 8 | 93 |  | No | 120 | 5 | 125 |
| Yes | 17 | 22 | 39 |  | Yes | 5 | 2 | 7 |
| Total | 102 | 30 | 132 |  | Total | 125 | 7 | 132 |
| *Exact agreement: 81.1%* | | | |  |  | *Exact agreement: 92.4%* | | |
|  |  |  |  |  |  |  |  |  |
| Re-abstraction | Original | | |  | Re-abstraction | Original | | |
| **Wound dehiscence** | No | Yes | Total |  | **Stoma complication** | No | Yes | Total |
| No | 120 | 2 | 122 |  | No | 124 | 1 | 125 |
| Yes | 4 | 6 | 10 |  | Yes | 4 | 3 | 7 |
| Total | 124 | 8 | 132 |  | Total | 128 | 4 | 132 |
|  | Exact agreement: 95.5% | | |  |  | Exact agreement: 96.2% | | |
|  |  |  |  |  |  |  |  |  |
| Re-abstraction | Original | | |  | Re-abstraction | Original | | |
| **Other surgical complication** | No | Yes | Total |  | **Other postoperative complication** | No | Yes | Total |
| No | 98 | 7 | 105 |  | No | 163 | 42 | 205 |
| Yes | 22 | 5 | 27 |  | Yes | 42 | 26 | 68 |
| Total | 120 | 12 | 132 |  | Total | 205 | 68 | 273 |
| *Exact agreement: 78.0%* | | | |  |  | Exact agreement: 69.2% | | |

Supplementary table 3. Crosstabulation of registered complications, stratified on non-severe (CD2-3a) and severe (3b-5) postoperative complications.

| | Re-abstraction | Original | | | | --- | --- | --- | --- | | **CD 2-3a** | No | Yes | Total | | No | 44 | 40 | 84 | | Yes | 70 | 119 | 189 | | Total | 114 | 159 | 273 | | *Exact agreement: 59.7%* κ*=0.32* | | | | | | Re-abstraction | Original | | | | --- | --- | --- | --- | | **CD 3b-5** | No | Yes | Total | | No | 219 | 5 | 224 | | Yes | 14 | 35 | 49 | | Total | 233 | 40 | 273 | | *Exact agreement: 93.0%* κ*=0.75* | | | | |
| --- | --- | --- | --- | --- | --- | --- | --- | --- | --- | --- | --- | --- | --- | --- | --- | --- | --- | --- | --- | --- | --- | --- | --- | --- | --- | --- | --- | --- | --- | --- | --- | --- | --- | --- | --- | --- | --- | --- | --- | --- | --- | --- | --- | --- | --- | --- | --- | --- | --- |

Supplementary table 4. Crosstabulation of variables for cancer recurrence

| Re-abstraction |  | Original |  |  | Re-abstraction |  | Original |  |
| --- | --- | --- | --- | --- | --- | --- | --- | --- |
| **Cancer recurrence** | No | Yes | Total |  | **Local recurrence** | No | Yes | Total |
| No | 400 | 10 | 410 |  | No | 66 | 6 | 71 |
| Yes | 13 | 92 | 105 |  | Yes | 7 | 13 | 20 |
| Total | 413 | 102 | 515 |  | Total | 73 | 19 | 92 |
| *Exact agreement: 95.7 %;* κ*=*0.86 | | | |  | *Exact agreement: 85.9%;* κ*=0.58* | | | |
|  |  |  |  |  |  |  |  |  |
| Re-abstraction |  | Original |  |  | Re-abstraction |  | Original |  |
| **Distant recurrence** | No | Yes | Total |  | **Liver metastasis** | No | Yes | Total |
| No | 4 | 5 | 9 |  | No | 31 | 2 | 33 |
| Yes | 5 | 78 | 83 |  | Yes | 6 | 39 | 45 |
| Total | 9 | 83 | 92 |  | Total | 37 | 41 | 78 |
| *Exact agreement:*  *89.1 %;* κ*=*0.34 | | | |  | *Exact agreement: 89.7%;* κ*=*0.79 | | | |
|  |  |  |  |  |  |  |  |  |
| Re-abstraction |  | Original |  |  | Re-abstraction |  | Original |  |
| **Lung metastasis** | No | Yes | Total |  | Metastasis, another site | No | Yes | Total |
| No | 34 | 4 | 38 |  | No | 42 | 19 | 61 |
| Yes | 3 | 37 | 40 |  | Yes | 6 | 11 | 17 |
| Total | 37 | 41 | 78 |  | Total | 48 | 30 | 78 |
| *Exact agreement: 91.0 %;* κ *=*0.82 | | | |  | *Exact agreement: 67.9 %;* κ *=*0.26 | | | |
